# Supplementary material for: Microbiome profiling of nasal extracellular vesicles in patients with allergic rhinitis
Source: PubMed Central journal article supplement — World Allergy Organ J. 2022 Aug 6;15(8):100674. doi: 10.1016/j.waojou.2022.100674 (PMC9386106; doi:10.1016/j.waojou.2022.100674), 2022-08-06
Supplement: mmc2.pdf [file mmc2.pdf]

Supplementary Fig. 2

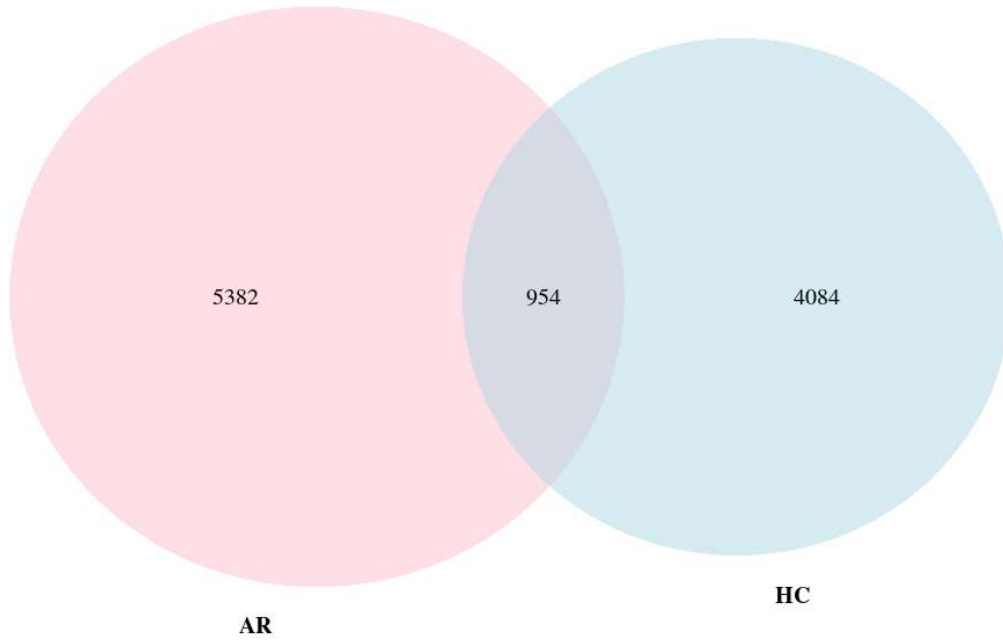

**Figure S2:** Venn diagrams of HCs group and AR group based on amplicon sequence variant (ASV) clustering
