# Supplementary figures and images for: Microbiome profiling of nasal extracellular vesicles in patients with allergic rhinitis
Source: PubMed Central journal article supplement — World Allergy Organ J. 2022 Aug 6;15(8):100674. doi: 10.1016/j.waojou.2022.100674 (PMC9386106; doi:10.1016/j.waojou.2022.100674), 2022-08-06

Supplementary Fig. 1

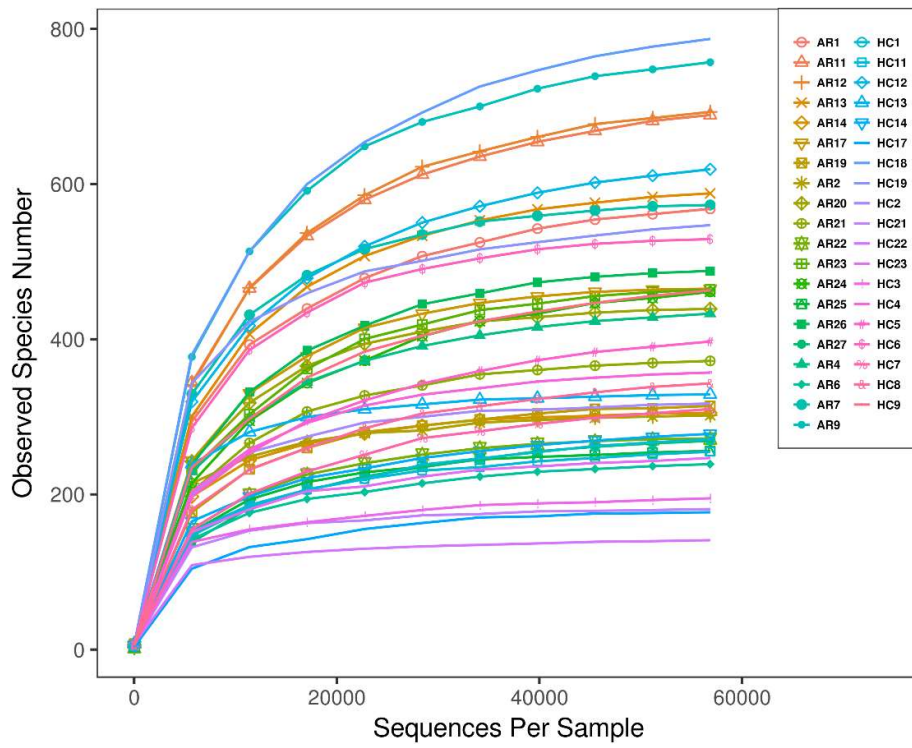

Figure S1: Species diversity curve -- dilution curve.

Supplement: mmc1.pdf [file mmc1.pdf]
